# Supplementary material for: Factors Associated with Behavioral and Psychological Symptoms of Dementia during COVID-19
Source: MDPI journal article supplement (doi:10.3390/ijerph191610094), 2022-08-15
Supplement: s1 [file s1]

Supplement Table S1. Proportion of patients with behavioral disorders in each item of DBD: before and during COVID-19 pandemic, by MCI and Dementia group

|                                                              | Total Group |            |                | MCI Patients |            |                | Dementia Patients |            |                |
|--------------------------------------------------------------|-------------|------------|----------------|--------------|------------|----------------|-------------------|------------|----------------|
|                                                              | Before      | During     | <i>P</i> value | Before       | During     | <i>P</i> value | Before            | During     | <i>P</i> value |
| 01. Asks the same question over and over again               | 1475 (82.9) | 484 (84.0) | 0.559          | 531 (71.9)   | 185 (78.1) | 0.073          | 944 (90.7)        | 299 (88.2) | 0.222          |
| 02. Loses, misplaces, or hides things                        | 1263 (71.0) | 416 (72.3) | 0.581          | 423 (57.2)   | 143 (60.3) | 0.444          | 840 (80.8)        | 273 (80.8) | 1.000          |
| 03. Shows lack of interest in daily activities               | 874 (49.4)  | 288 (50.4) | 0.712          | 245 (33.2)   | 78 (33.2)  | 1.000          | 629 (61.0)        | 210 (62.5) | 0.672          |
| 04. Wakes up at night for no obvious reason                  | 266 (15.2)  | 113 (19.9) | <b>0.010</b>   | 43 (5.9)     | 24 (10.2)  | <b>0.033</b>   | 223 (21.0)        | 89 (26.7)  | 0.082          |
| 05. Makes unwarranted accusations                            | 321 (18.1)  | 118 (20.5) | 0.214          | 84 (11.4)    | 34 (14.3)  | 0.267          | 237 (22.9)        | 84 (24.9)  | 0.502          |
| 06. Sleeps excessively during the day                        | 687 (38.8)  | 245 (42.6) | 0.117          | 197 (26.7)   | 79 (33.3)  | 0.060          | 490 (47.4)        | 166 (49.1) | 0.636          |
| 07. Paces up and down                                        | 171 (9.7)   | 70 (12.2)  | 0.096          | 28 (3.8)     | 6 (2.5)    | 0.473          | 143 (13.8)        | 64 (19.0)  | <b>0.027</b>   |
| 08. Repeats the same action over and over again              | 239 (13.5)  | 81 (14.1)  | 0.751          | 50 (6.8)     | 16 (6.8)   | 1.000          | 189 (18.3)        | 65 (19.3)  | 0.739          |
| 09. Is verbally abusive, curses                              | 287 (16.2)  | 104 (18.1) | 0.308          | 81 (11.0)    | 39 (16.5)  | <b>0.034</b>   | 206 (19.8)        | 65 (19.2)  | 0.872          |
| 10. Dresses inappropriately                                  | 305 (17.2)  | 102 (17.8) | 0.778          | 56 (7.6)     | 21 (8.9)   | 0.606          | 249 (24.0)        | 81 (24.0)  | 1.000          |
| 11. Cries or laughs inappropriately                          | 108 (6.1)   | 46 (8.0)   | 0.123          | 11 (1.5)     | 9 (3.8)    | 0.055          | 97 (9.3)          | 37 (11.0)  | 0.430          |
| 12. Refuses to be helped with personal care                  | 354 (19.9)  | 124 (21.6) | 0.435          | 100 (13.6)   | 37 (15.6)  | 0.492          | 254 (24.5)        | 87 (25.7)  | 0.698          |
| 13. Hoards things for no obvious reason                      | 410 (23.1)  | 151 (26.4) | 0.127          | 103 (14.0)   | 47 (19.9)  | 0.035          | 307 (29.6)        | 104 (30.9) | 0.720          |
| 14. Moves arms or legs in a restless or agitated way         | 126 (7.1)   | 35 (6.1)   | 0.471          | 36 (4.9)     | 9 (3.8)    | 0.626          | 90 (8.7)          | 26 (7.7)   | 0.650          |
| 15. Empties drawers or closets                               | 134 (7.5)   | 48 (8.4)   | 0.567          | 14 (1.9)     | 6 (2.6)    | 0.720          | 120 (11.6)        | 42 (12.5)  | 0.731          |
| 16. Wanders in the house at night                            | 88 (5.0)    | 38 (6.7)   | 0.154          | 9 (1.2)      | 2 (0.9)    | 0.917          | 79 (7.7)          | 36 (10.7)  | 0.110          |
| 17. Gets lost outside                                        | 89 (5.0)    | 43 (7.5)   | <b>0.031</b>   | 6 (0.8)      | 5 (2.1)    | 0.190          | 83 (8.0)          | 38 (11.3)  | 0.085          |
| 18. Refuses to eat                                           | 72 (4.1)    | 23 (4.0)   | 1.000          | 12 (1.6)     | 4 (1.7)    | 1.000          | 60 (5.8)          | 19 (5.7)   | 1.000          |
| 19. Overeats                                                 | 267 (15.0)  | 82 (14.30) | 0.730          | 79 (10.7)    | 21 (8.9)   | 0.509          | 188 (18.2)        | 61 (18.2)  | 1.000          |
| 20. Is incontinent of urine                                  | 229 (12.9)  | 77 (13.4)  | 0.809          | 40 (5.4)     | 17 (7.2)   | 0.389          | 189 (18.3)        | 60 (17.8)  | 0.897          |
| 21. Wanders aimlessly outside or in the house during the day | 79 (4.5)    | 39 (6.8)   | <b>0.033</b>   | 4 (0.5)      | 1 (0.4)    | 1.000          | 75 (7.2)          | 38 (11.3)  | <b>0.026</b>   |
| 22. Physical attacks                                         | 44 (2.5)    | 22 (3.8)   | 0.117          | 8 (1.1)      | 7 (3.0)    | 0.081          | 36 (3.5)          | 15 (4.4)   | 0.513          |

|                                         |          |          |       |          |         |       |          |          |       |
|-----------------------------------------|----------|----------|-------|----------|---------|-------|----------|----------|-------|
| 23. Screams for no reason               | 47 (2.6) | 17 (3.0) | 0.790 | 12 (1.6) | 5 (2.1) | 0.826 | 35 (3.4) | 12 (3.6) | 1.000 |
| 24. Makes inappropriate sexual advances | 13 (0.7) | 2 (0.3)  | 0.484 | 8 (1.1)  | 0 (0.0) | 0.234 | 5 (0.5)  | 2 (0.6)  | 1.000 |
| 25. Exposes himself/herself indecently  | 5 (0.3)  | 1 (0.2)  | 1.000 | 0 (0.0)  | 0 (0.0) | 1.000 | 5 (0.5)  | 1 (0.3)  | 1.000 |
| 26. Destroys property or clothing       | 21 (1.2) | 5 (0.9)  | 0.699 | 3 (0.4)  | 1 (0.4) | 1.000 | 18 (1.7) | 4 (1.2)  | 0.653 |
| 27. Is incontinent of feces             | 85 (4.8) | 32 (5.6) | 0.519 | 10 (1.4) | 6 (2.5) | 0.338 | 75 (7.2) | 26 (7.7) | 0.872 |
| 28. Throws food                         | 15 (0.8) | 2 (0.3)  | 0.348 | 4 (0.5)  | 1 (0.4) | 1.000 | 11 (1.1) | 1 (0.3)  | 0.328 |

\* For each item of the DBD, “positive for the behavioral disorder” was defined as an answer of “sometimes”, “often”, or “always,” and the proportion was calculated. *P* values in **bold** indicate statistical significance. Abbreviations: DBD = Dementia Behavioral Disturbance Scale.
